# Supplementary material for: Can Human Movements Explain Heterogeneous Propagation of Dengue Fever in Cambodia?
Source: PubMed Central journal article supplement (PMC3516584; doi:10.1371/journal.pntd.0001957), 2012-12-06

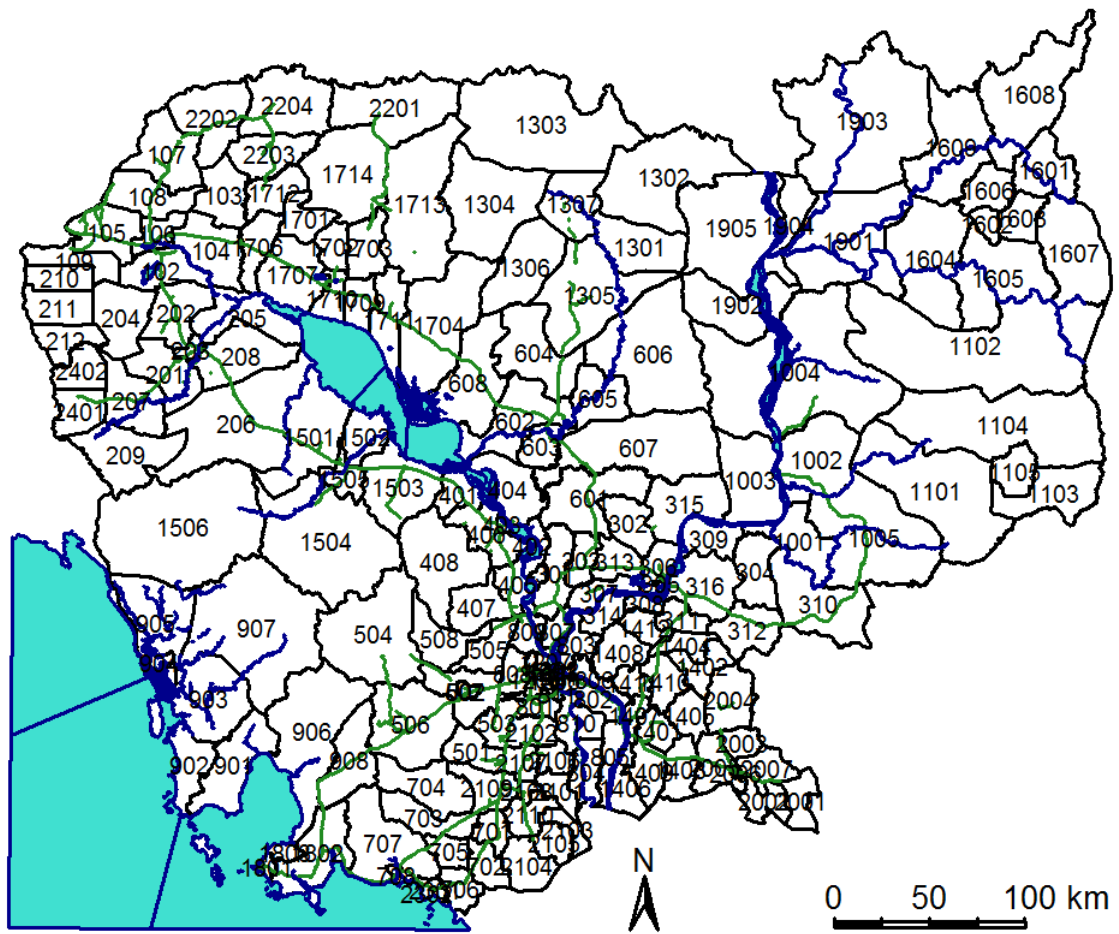

Wavelet power spectrum of district 102

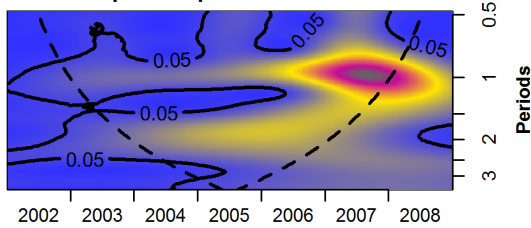

Wavelet power spectrum of district 104

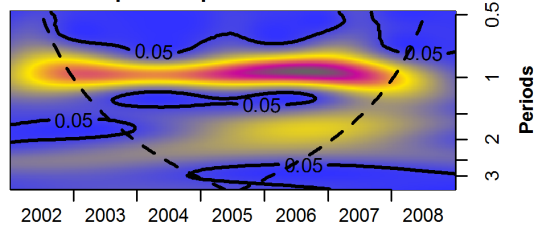

Wavelet power spectrum of district 103

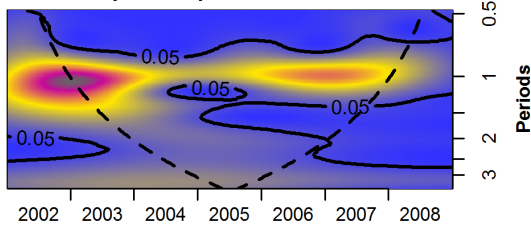

Wavelet power spectrum of district 105

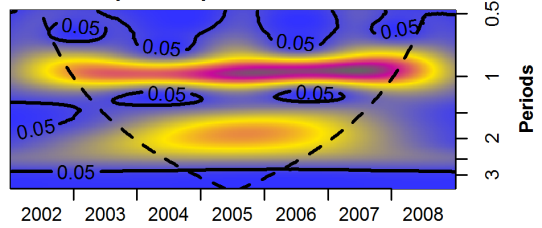

Wavelet power spectrum of district 106

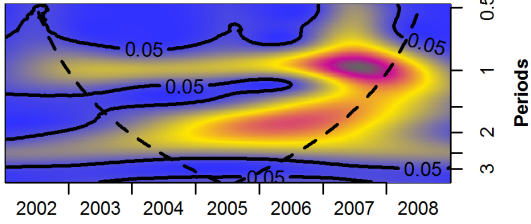

Wavelet power spectrum of district 204

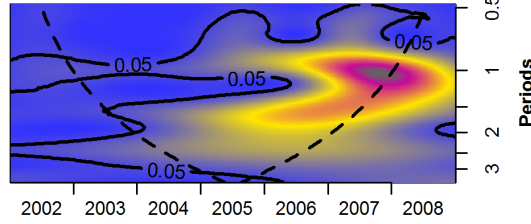

Wavelet power spectrum of district 107

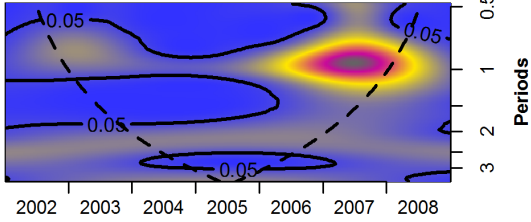

Wavelet power spectrum of district 205

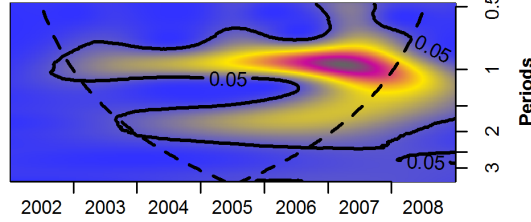

Wavelet power spectrum of district 108

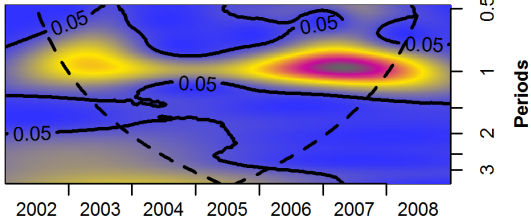

Wavelet power spectrum of district 206

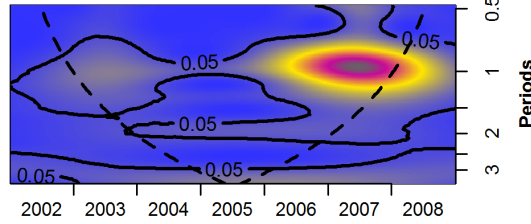

Wavelet power spectrum of district 109

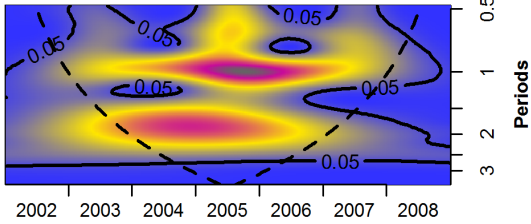

Wavelet power spectrum of district 207

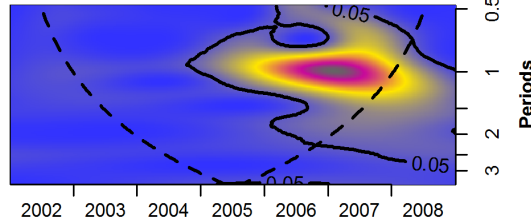

Wavelet power spectrum of district 201

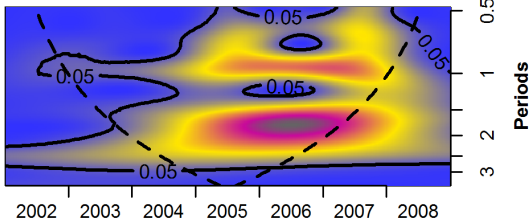

Wavelet power spectrum of district 208

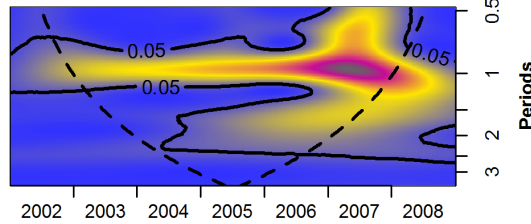

Wavelet power spectrum of district 202

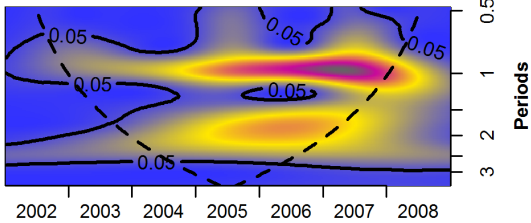

Wavelet power spectrum of district 210

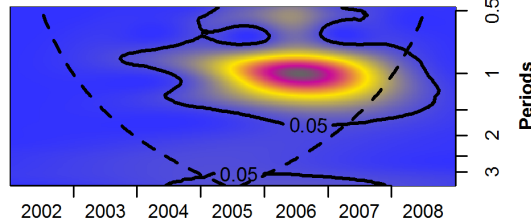

Wavelet power spectrum of district 203

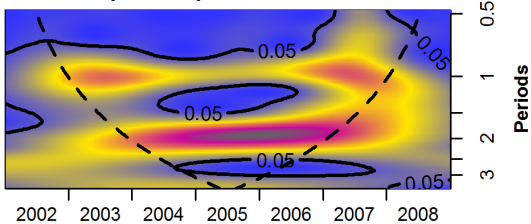

Wavelet power spectrum of district 212

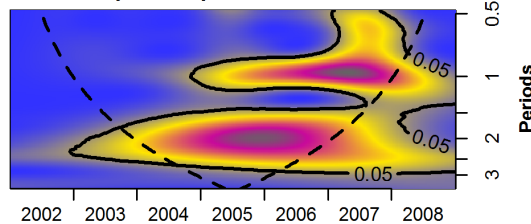



Wavelet power spectrum of district 315

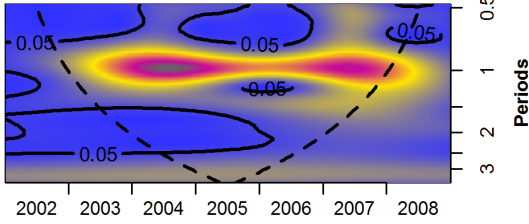

Wavelet power spectrum of district 406

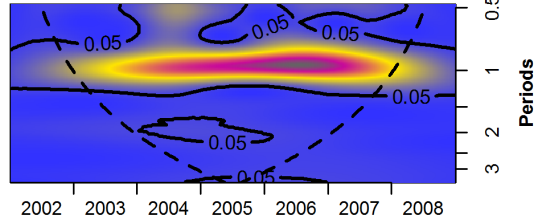

Wavelet power spectrum of district 316

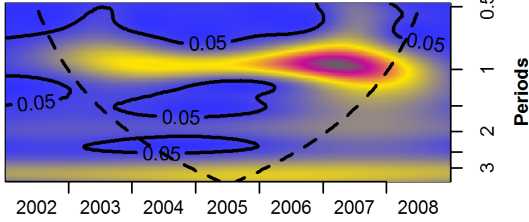

Wavelet power spectrum of district 407

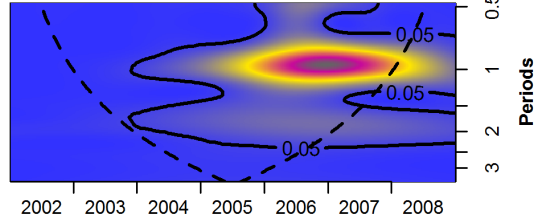

Wavelet power spectrum of district 401

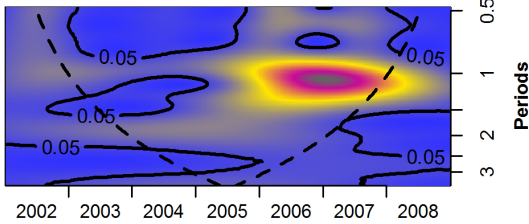

Wavelet power spectrum of district 408

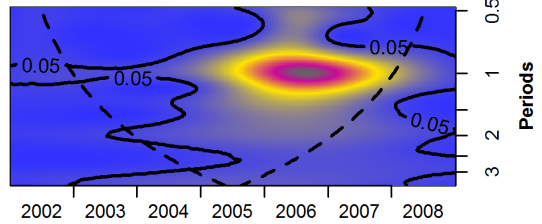

Wavelet power spectrum of district 402

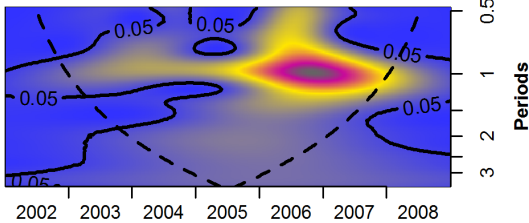

Wavelet power spectrum of district 501

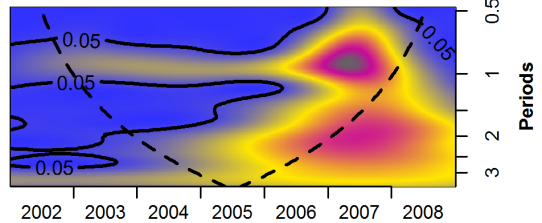

Wavelet power spectrum of district 403

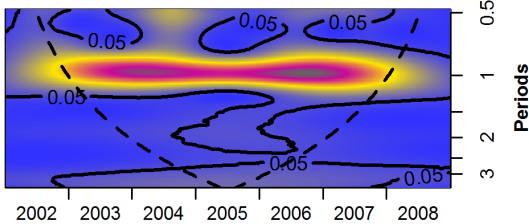

Wavelet power spectrum of district 502

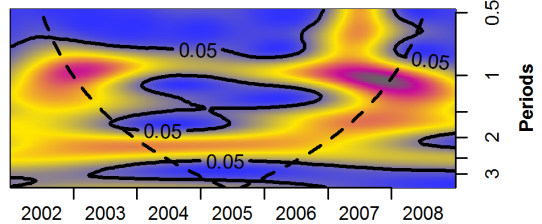

Wavelet power spectrum of district 404

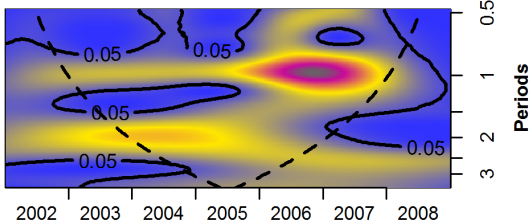

Wavelet power spectrum of district 503

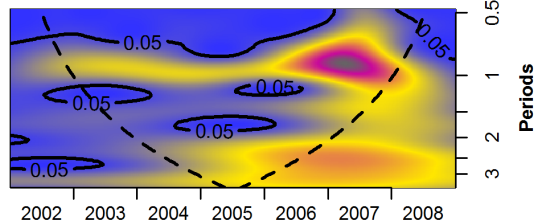

Wavelet power spectrum of district 405

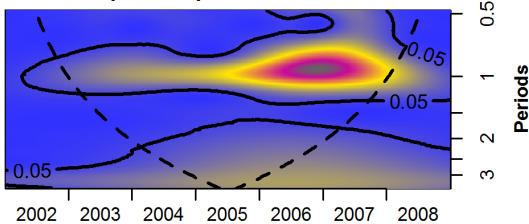

Wavelet power spectrum of district 505

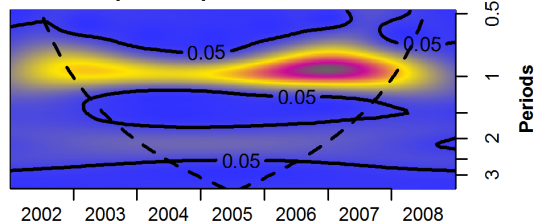















**Wavelet power spectrum of district 2202**

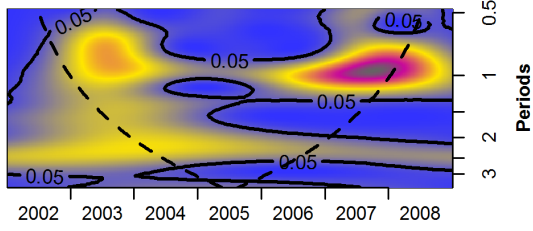

**Wavelet power spectrum of district 2203**

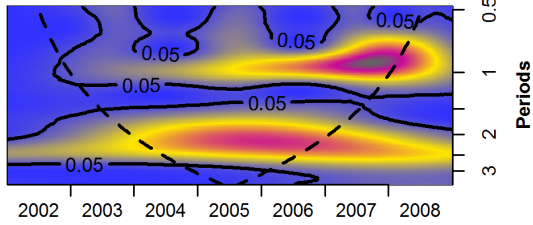

**Wavelet power spectrum of district 2301**

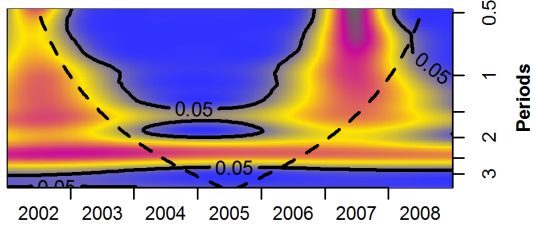

**Wavelet power spectrum of district 2401**

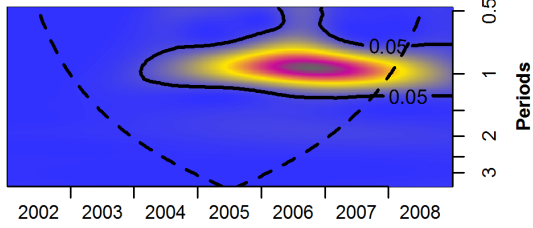

Supplement: pntd.0001957.s002.pdf [file pntd.0001957.s002.pdf]
